# Supplementary material for: Exome Sequencing–Based Screening for BRCA1/2 Expected Pathogenic Variants Among Adult Biobank Participants
Source: PubMed Central journal article supplement (PMC6324494; doi:10.1001/jamanetworkopen.2018.2140), 2018-09-21

## Supplementary Online Content

Manickam K, Buchanan AH, Schwartz MLB, et al. Exome sequencing–based screening for *BRCA1/2* expected pathogenic variants among adult biobank participants. *JAMA Netw Open*. 2018;1(5):e182140.  
doi:10.1001/jamanetworkopen.2018.2140

**eTable 1.** List of All Pathogenic and Likely Pathogenic Variants in *BRCA1* and *BRCA2* That Were Identified in Cohort

**eTable 2.** The Overall Prevalence and Prevalence Controlling for Relatedness

**eTable 3.** Cause of Death Analysis

**eTable 4.** Relevant Cancer Among the Living Cases

**eTable 5.** Table Demonstrating Groupings for Odds Ratio Calculations for Figure 2B-D

**eFigure 1.** Pedigree and Case Story

**eFigure 2.** Family Health History in EHR of *BRCA1/2* Cases (Women and Men)

This supplementary material has been provided by the authors to give readers additional information about their work.

**eTable 1.** List of All Pathogenic and Likely Pathogenic Variants in *BRCA1* and *BRCA2* That Were Identified in Cohort

**eTable 1A.** *BRCA1* (NM\_007294.3) Variant List

|     | Gene         | Function       | cDNA position       | Protein change    | pLOF | LMM variant call | ClinVar Significance | ClinVar link (accessed 1/1/18)                                                                                              | # cases | Cancer Reported All | Cancer Reported Women |
|-----|--------------|----------------|---------------------|-------------------|------|------------------|----------------------|-----------------------------------------------------------------------------------------------------------------------------|---------|---------------------|-----------------------|
| 1   | <i>BRCA1</i> | Frameshift     | c.68_69delAG        | p.Glu23Valfs*17   | Yes  | P                | pathogenic*3         | <a href="https://www.ncbi.nlm.nih.gov/clinvar/variation/17662/">https://www.ncbi.nlm.nih.gov/clinvar/variation/17662/</a>   | 5       | 1 of 5 (20%)        | 1 of 3 (33%)          |
| 2   | <i>BRCA1</i> | Frameshift     | c.143delT           | p.Met48Serfs*2    | Yes  | P                | pathogenic*3         | <a href="https://www.ncbi.nlm.nih.gov/clinvar/variation/37412/">https://www.ncbi.nlm.nih.gov/clinvar/variation/37412/</a>   | 2       | 1 of 2 (50%)        | 1 of 1 (100%)         |
| 3   | <i>BRCA1</i> | Missense       | c.181T>G            | p.Cys61Gly        | No   | P                | pathogenic*3         | <a href="https://www.ncbi.nlm.nih.gov/clinvar/variation/17661/">https://www.ncbi.nlm.nih.gov/clinvar/variation/17661/</a>   | 1       | 0 of 1 (0%)         | 0 of 1 (0%)           |
| 4   | <i>BRCA1</i> | Splice variant | c.213-11T>G         | NA                | Yes  | P                | Pathogenic*2         | <a href="http://www.ncbi.nlm.nih.gov/clinvar/variation/37449">http://www.ncbi.nlm.nih.gov/clinvar/variation/37449</a>       | 1       | 1 of 1 (100%)       | -                     |
| 5   | <i>BRCA1</i> | Splice variant | c.213-12A>G         | NA                | Yes  | P                | pathogenic*2         | <a href="https://www.ncbi.nlm.nih.gov/clinvar/variation/37450/">https://www.ncbi.nlm.nih.gov/clinvar/variation/37450/</a>   | 1       | 0 of 1 (0%)         | -                     |
| 6   | <i>BRCA1</i> | Frameshift     | c.844_850dupTCATTAC | p.Gln284Leufs*5   | Yes  | P                | pathogenic*3         | <a href="https://www.ncbi.nlm.nih.gov/clinvar/variation/55735/">https://www.ncbi.nlm.nih.gov/clinvar/variation/55735/</a>   | 1       | 0 of 1 (0%)         | -                     |
| 7   | <i>BRCA1</i> | Termination    | c.1480C>T           | p.Gln494*         | Yes  | P                | pathogenic*3         | <a href="https://www.ncbi.nlm.nih.gov/clinvar/variation/37415/">https://www.ncbi.nlm.nih.gov/clinvar/variation/37415/</a>   | 3       | 1 of 3 (33%)        | 1 of 2 (50%)          |
| 8   | <i>BRCA1</i> | Frameshift     | c.1812delA          | p.Ala605Hisfs*7   | Yes  | P                | pathogenic*3         | <a href="https://www.ncbi.nlm.nih.gov/clinvar/variation/125513/">https://www.ncbi.nlm.nih.gov/clinvar/variation/125513/</a> | 1       | 1 of 1 (100%)       | 1 of 1 (100%)         |
| 9   | <i>BRCA1</i> | Frameshift     | c.1881_1884delCAGT  | p.Ser628Gluufs*3  | Yes  | P                | pathogenic*3         | <a href="http://www.ncbi.nlm.nih.gov/clinvar/variation/54379">http://www.ncbi.nlm.nih.gov/clinvar/variation/54379</a>       | 1       | 0 of 1 (0%)         | 0 of 1 (0%)           |
| 10  | <i>BRCA1</i> | Frameshift     | c.1953_1956delGAAA  | p.Lys653Serfs*47  | Yes  | P                | pathogenic*3         | <a href="https://www.ncbi.nlm.nih.gov/clinvar/variation/37435/">https://www.ncbi.nlm.nih.gov/clinvar/variation/37435/</a>   | 2       | 1 of 2 (50%)        | 1 of 2 (50%)          |
| 11* | <i>BRCA1</i> | Frameshift     | c.2090delT          | p.Phe697Serfs*4   | Yes  | P                | (novel)              | <a href="https://www.ncbi.nlm.nih.gov/clinvar/variation/440454/">https://www.ncbi.nlm.nih.gov/clinvar/variation/440454/</a> | 1       | 0 of 1 (0%)         | 0 of 1 (0%)           |
| 12  | <i>BRCA1</i> | Termination    | c.2309C>A           | p.Ser770*         | Yes  | P                | pathogenic*3         | <a href="https://www.ncbi.nlm.nih.gov/clinvar/variation/54527/">https://www.ncbi.nlm.nih.gov/clinvar/variation/54527/</a>   | 8       | 4 of 8 (50%)        | 2 of 2 (100%)         |
| 13  | <i>BRCA1</i> | Termination    | c.2338C>T           | p.Gln780*         | Yes  | P                | pathogenic*3         | <a href="https://www.ncbi.nlm.nih.gov/clinvar/variation/54540/">https://www.ncbi.nlm.nih.gov/clinvar/variation/54540/</a>   | 1       | 1 of 1 (100%)       | 1 of 1 (100%)         |
| 14  | <i>BRCA1</i> | Frameshift     | c.2443delA          | p.Ile815Phefs*31  | Yes  | P                | pathogenic*3         | <a href="https://www.ncbi.nlm.nih.gov/clinvar/variation/54572/">https://www.ncbi.nlm.nih.gov/clinvar/variation/54572/</a>   | 1       | 0 of 1 (0%)         | -                     |
| 15  | <i>BRCA1</i> | Frameshift     | c.2457delC          | p.Asp821Ilefs*25  | Yes  | P                | pathogenic*3         | <a href="https://www.ncbi.nlm.nih.gov/clinvar/variation/37471/">https://www.ncbi.nlm.nih.gov/clinvar/variation/37471/</a>   | 1       | 1 of 1 (100%)       | 1 of 1 (100%)         |
| 16  | <i>BRCA1</i> | Frameshift     | c.2679_2682delGAAA  | p.Lys893Asnfs*160 | Yes  | P                | pathogenic*3         | <a href="https://www.ncbi.nlm.nih.gov/clinvar/variation/37481/">https://www.ncbi.nlm.nih.gov/clinvar/variation/37481/</a>   | 1       | 0 of 1 (0%)         | -                     |
| 17  | <i>BRCA1</i> | Frameshift     | c.2681_2682delIAA   | p.Lys894Thrfs*8   | Yes  | P                | pathogenic*3         | <a href="https://www.ncbi.nlm.nih.gov/clinvar/variation/17667/">https://www.ncbi.nlm.nih.gov/clinvar/variation/17667/</a>   | 1       | 0 of 1 (0%)         | -                     |
| 18  | <i>BRCA1</i> | Termination    | c.2722G>T           | p.Glu908*         | Yes  | P                | pathogenic*3         | <a href="https://www.ncbi.nlm.nih.gov/clinvar/variation/54657/">https://www.ncbi.nlm.nih.gov/clinvar/variation/54657/</a>   | 3       | 2 of 3 (67%)        | 2 of 3 (66%)          |

|    | Gene  | Function       | cDNA position             | Protein change    | pLOF | LMM variant call | ClinVar Significance     | ClinVar link (accessed 1/1/18)                                                                                              | # cases | Cancer Reported All | Cancer Reported Women |
|----|-------|----------------|---------------------------|-------------------|------|------------------|--------------------------|-----------------------------------------------------------------------------------------------------------------------------|---------|---------------------|-----------------------|
| 19 | BRCA1 | Frameshift     | c.2823delT                | p.Asn941Lysfs*59  | Yes  | P                | pathogenic* <sub>3</sub> | <a href="https://www.ncbi.nlm.nih.gov/clinvar/variation/266306/">https://www.ncbi.nlm.nih.gov/clinvar/variation/266306/</a> | 1       | 0 of 1 (0%)         | 0 of 1 (0%)           |
| 20 | BRCA1 | Frameshift     | c.2882delA                | p.Asn961Thrfs*39  | Yes  | P                | pathogenic* <sub>3</sub> | <a href="https://www.ncbi.nlm.nih.gov/clinvar/variation/266315/">https://www.ncbi.nlm.nih.gov/clinvar/variation/266315/</a> | 2       | 1 of 2 (50%)        | 1 of 1 (100%)         |
| 21 | BRCA1 | Frameshift     | c.3005delA                | p.Asn1002Thrfs*22 | Yes  | P                | pathogenic* <sub>3</sub> | <a href="https://www.ncbi.nlm.nih.gov/clinvar/variation/17669/">https://www.ncbi.nlm.nih.gov/clinvar/variation/17669/</a>   | 1       | 1 of 1 (100%)       | 1 of 1 (100%)         |
| 22 | BRCA1 | Termination    | c.3331C>T                 | p.Gln1111*        | Yes  | P                | pathogenic* <sub>3</sub> | <a href="https://www.ncbi.nlm.nih.gov/clinvar/variation/54845/">https://www.ncbi.nlm.nih.gov/clinvar/variation/54845/</a>   | 3       | 1 of 3 (33%)        | 1 of 2 (50%)          |
| 23 | BRCA1 | Frameshift     | c.3481_3491delGAAGATACTAG | p.Glu1161Phefs*3  | Yes  | P                | pathogenic* <sub>3</sub> | <a href="https://www.ncbi.nlm.nih.gov/clinvar/variation/17684/">https://www.ncbi.nlm.nih.gov/clinvar/variation/17684/</a>   | 1       | 0 of 1 (0%)         | -                     |
| 24 | BRCA1 | Frameshift     | c.3485delA                | p.Asp1162Valfs*48 | Yes  | P                | pathogenic* <sub>3</sub> | <a href="https://www.ncbi.nlm.nih.gov/clinvar/variation/37531/">https://www.ncbi.nlm.nih.gov/clinvar/variation/37531/</a>   | 1       | 0 of 1 (0%)         | -                     |
| 25 | BRCA1 | Termination    | c.3607C>T                 | p.Arg1203*        | Yes  | P                | pathogenic* <sub>3</sub> | <a href="https://www.ncbi.nlm.nih.gov/clinvar/variation/17671/">https://www.ncbi.nlm.nih.gov/clinvar/variation/17671/</a>   | 3       | 0 of 3 (0%)         | 0 of 2 (0%)           |
| 26 | BRCA1 | Frameshift     | c.3648dupA                | p.Ser1217Ilefs*2  | Yes  | P                | pathogenic* <sub>3</sub> | <a href="https://www.ncbi.nlm.nih.gov/clinvar/variation/37535/">https://www.ncbi.nlm.nih.gov/clinvar/variation/37535/</a>   | 1       | 0 of 1 (0%)         | 0 of 1 (0%)           |
| 27 | BRCA1 | Frameshift     | c.3700_3704delGTAAA       | p.Val1234Glnfs*8  | Yes  | P                | pathogenic* <sub>3</sub> | <a href="https://www.ncbi.nlm.nih.gov/clinvar/variation/37542/">https://www.ncbi.nlm.nih.gov/clinvar/variation/37542/</a>   | 1       | 0 of 1 (0%)         | -                     |
| 28 | BRCA1 | Termination    | c.3718C>T                 | p.Gln1240*        | Yes  | P                | pathogenic* <sub>3</sub> | <a href="https://www.ncbi.nlm.nih.gov/clinvar/variation/54978/">https://www.ncbi.nlm.nih.gov/clinvar/variation/54978/</a>   | 1       | 0 of 1 (0%)         | -                     |
| 29 | BRCA1 | Frameshift     | c.3767_3768delCA          | p.Thr1256Argfs*10 | Yes  | P                | pathogenic* <sub>3</sub> | <a href="https://www.ncbi.nlm.nih.gov/clinvar/variation/182074/">https://www.ncbi.nlm.nih.gov/clinvar/variation/182074/</a> | 2       | 1 of 2 (50%)        | 1 of 2 (50%)          |
| 30 | BRCA1 | Frameshift     | c.4035delA                | p.Glu1346Lysfs*20 | Yes  | P                | pathogenic* <sub>3</sub> | <a href="https://www.ncbi.nlm.nih.gov/clinvar/variation/37560/">https://www.ncbi.nlm.nih.gov/clinvar/variation/37560/</a>   | 5       | 3 of 5 (60%)        | 3 of 5 (60%)          |
| 31 | BRCA1 | Termination    | c.4222C>T                 | p.Gln1408*        | Yes  | P                | pathogenic* <sub>3</sub> | <a href="https://www.ncbi.nlm.nih.gov/clinvar/variation/55145/">https://www.ncbi.nlm.nih.gov/clinvar/variation/55145/</a>   | 1       | 0 of 1 (0%)         | 0 of 1 (0%)           |
| 32 | BRCA1 | Termination    | c.4327C>T                 | p.Arg1443*        | Yes  | P                | pathogenic* <sub>3</sub> | <a href="https://www.ncbi.nlm.nih.gov/clinvar/variation/17675/">https://www.ncbi.nlm.nih.gov/clinvar/variation/17675/</a>   | 1       | 0 of 1 (0%)         | -                     |
| 33 | BRCA1 | Termination    | c.4389C>A                 | p.Tyr1463*        | Yes  | P                | pathogenic* <sub>3</sub> | <a href="https://www.ncbi.nlm.nih.gov/clinvar/variation/55187/">https://www.ncbi.nlm.nih.gov/clinvar/variation/55187/</a>   | 1       | 0 of 1 (0%)         | 0 of 1 (0%)           |
| 34 | BRCA1 | Missense       | c.4484G>T                 | p.Arg1495Met      | No   | P                | pathogenic* <sub>2</sub> | <a href="https://www.ncbi.nlm.nih.gov/clinvar/variation/37598/">https://www.ncbi.nlm.nih.gov/clinvar/variation/37598/</a>   | 1       | 0 of 1 (0%)         | -                     |
| 35 | BRCA1 | Splice variant | c.4485-1G>T               | NA                | Yes  | P                | pathogenic* <sub>2</sub> | <a href="https://www.ncbi.nlm.nih.gov/clinvar/variation/246501/">https://www.ncbi.nlm.nih.gov/clinvar/variation/246501/</a> | 2       | 1 of 2 (50%)        | 0 of 1 (0%)           |
| 36 | BRCA1 | Termination    | c.4524G>A                 | p.Trp1508*        | Yes  | P                | pathogenic* <sub>3</sub> | <a href="https://www.ncbi.nlm.nih.gov/clinvar/variation/55221/">https://www.ncbi.nlm.nih.gov/clinvar/variation/55221/</a>   | 1       | 0 of 1 (0%)         | 0 of 1 (0%)           |
| 37 | BRCA1 | Splice variant | c.4484+1G>A               | NA                | Yes  | P                | pathogenic* <sub>2</sub> | <a href="https://www.ncbi.nlm.nih.gov/clinvar/variation/37596/">https://www.ncbi.nlm.nih.gov/clinvar/variation/37596/</a>   | 1       | 0 of 1 (0%)         | -                     |
| 38 | BRCA1 | Termination    | c.4689C>G                 | p.Tyr1563*        | Yes  | P                | pathogenic* <sub>3</sub> | <a href="https://www.ncbi.nlm.nih.gov/clinvar/variation/37607/">https://www.ncbi.nlm.nih.gov/clinvar/variation/37607/</a>   | 1       | 1 of 1 (100%)       | 1 of 1 (100%)         |
| 39 | BRCA1 | Frameshift     | c.4754_4755delCA          | p.Pro1585Argfs*36 | Yes  | P                | pathogenic* <sub>3</sub> | <a href="https://www.ncbi.nlm.nih.gov/clinvar/variation/55280/">https://www.ncbi.nlm.nih.gov/clinvar/variation/55280/</a>   | 1       | 0 of 1 (0%)         | -                     |
|    |       |                |                           |                   |      |                  |                          |                                                                                                                             |         |                     |                       |

|    | Gene  | Function       | cDNA position      | Protein change    | pLOF | LMM variant call | ClinVar Significance | ClinVar link (accessed 1/1/18)                                                                                            | # cases | Cancer Reported All | Cancer Reported Women |
|----|-------|----------------|--------------------|-------------------|------|------------------|----------------------|---------------------------------------------------------------------------------------------------------------------------|---------|---------------------|-----------------------|
| 40 | BRCA1 | Missense       | c.4868C>G          | p.Ala1623Gly      | No   | LP               | conflicting *1       | <a href="https://www.ncbi.nlm.nih.gov/clinvar/variation/37614/">https://www.ncbi.nlm.nih.gov/clinvar/variation/37614/</a> | 1       | 0 of 1 (0%)         | -                     |
| 41 | BRCA1 | Missense       | c.5066T>G          | p.Met1689Arg      | No   | LP               | conflicting *1       | <a href="https://www.ncbi.nlm.nih.gov/clinvar/variation/37625/">https://www.ncbi.nlm.nih.gov/clinvar/variation/37625/</a> | 2       | 1 of 2 (50%)        | 1 of 2 (50%)          |
| 42 | BRCA1 | Missense       | c.5096G>A          | p.Arg1699Gln      | No   | LP               | conflicting *1       | <a href="https://www.ncbi.nlm.nih.gov/clinvar/variation/37636/">https://www.ncbi.nlm.nih.gov/clinvar/variation/37636/</a> | 1       | 0 of 1 (0%)         | 0 of 1 (0%)           |
| 43 | BRCA1 | Missense       | c.5123C>A          | p.Ala1708Glu      | No   | P                | pathogenic *3        | <a href="https://www.ncbi.nlm.nih.gov/clinvar/variation/55407/">https://www.ncbi.nlm.nih.gov/clinvar/variation/55407/</a> | 1       | 1 of 1 (100%)       | 1 of 1 (100%)         |
| 44 | BRCA1 | Frameshift     | c.5137delG         | p.Val1713*        | Yes  | P                | pathogenic *3        | <a href="https://www.ncbi.nlm.nih.gov/clinvar/variation/55411/">https://www.ncbi.nlm.nih.gov/clinvar/variation/55411/</a> | 1       | 0 of 1 (0%)         | -                     |
| 45 | BRCA1 | Splice variant | c.5153-2delA       | NA                | Yes  | P                | pathogenic *2        | <a href="https://www.ncbi.nlm.nih.gov/clinvar/variation/55431/">https://www.ncbi.nlm.nih.gov/clinvar/variation/55431/</a> | 1       | 0 of 1 (0%)         | 0 of 1 (0%)           |
| 46 | BRCA1 | Frameshift     | c.5177_5180delGAAA | p.Arg1726Lysfs*3  | Yes  | P                | pathogenic *3        | <a href="https://www.ncbi.nlm.nih.gov/clinvar/variation/37644/">https://www.ncbi.nlm.nih.gov/clinvar/variation/37644/</a> | 1       | 0 of 1 (0%)         | -                     |
| 47 | BRCA1 | Missense       | c.5180G>A          | p.Gly1706Glu      | No   | LP               | pathogenic *3        | <a href="https://www.ncbi.nlm.nih.gov/clinvar/variation/37638/">https://www.ncbi.nlm.nih.gov/clinvar/variation/37638/</a> | 1       | 0 of 1 (0%)         | -                     |
| 48 | BRCA1 | Missense       | c.5123C>A          | p.Ala1708Glu      | No   | P                | pathogenic *3        | <a href="https://www.ncbi.nlm.nih.gov/clinvar/variation/55407/">https://www.ncbi.nlm.nih.gov/clinvar/variation/55407/</a> | 1       | 1 of 1 (100%)       | 1 of 1 (100%)         |
| 49 | BRCA1 | Termination    | c.5251C>T          | p.Arg1751*        | Yes  | P                | pathogenic *3        | <a href="https://www.ncbi.nlm.nih.gov/clinvar/variation/55480/">https://www.ncbi.nlm.nih.gov/clinvar/variation/55480/</a> | 1       | 0 of 1 (0%)         | -                     |
| 50 | BRCA1 | Frameshift     | c.5266dupC         | p.Gln1756Profs*74 | Yes  | P                | pathogenic *3        | <a href="https://www.ncbi.nlm.nih.gov/clinvar/variation/17677/">https://www.ncbi.nlm.nih.gov/clinvar/variation/17677/</a> | 14      | 4 of 14 (29%)       | 2 of 5 (40%)          |
| 51 | BRCA1 | Termination    | c.5345G>A          | p.Trp1782*        | Yes  | P                | pathogenic *3        | <a href="https://www.ncbi.nlm.nih.gov/clinvar/variation/55544/">https://www.ncbi.nlm.nih.gov/clinvar/variation/55544/</a> | 2       | 0 of 2 (0%)         | 0 of 2 (0%)           |
| 52 | BRCA1 | Termination    | c.5503C>T          | p.Arg1835*        | Yes  | P                | pathogenic *3        | <a href="https://www.ncbi.nlm.nih.gov/clinvar/variation/55601/">https://www.ncbi.nlm.nih.gov/clinvar/variation/55601/</a> | 1       | 0 of 1 (0%)         | -                     |

\* Row 11- this variant was first reported by this project in ClinVar (01-2017)

**eTable 1B. BRCA2 (NM\_000059.3) Variant List**

|    | Gene  | Function       | cDNA position      | Protein change   | pLOF | LMM variant call | ClinVar Significance           | ClinVar link (accessed 6/7/17)                                                                                              | # cases | Cancer diagnosis All | Cancer diagnosis Women |
|----|-------|----------------|--------------------|------------------|------|------------------|--------------------------------|-----------------------------------------------------------------------------------------------------------------------------|---------|----------------------|------------------------|
| 1  | BRCA2 | Frameshift     | c.22_23delAG       | p.Arg8Alafs*5    | Yes  | P                | pathogenic* <sub>3</sub>       | <a href="https://www.ncbi.nlm.nih.gov/clinvar/variation/51267/">https://www.ncbi.nlm.nih.gov/clinvar/variation/51267/</a>   | 1       | 0 of 1 (0%)          | -                      |
| 2  | BRCA2 | Splice variant | c.517-2A>G         | NA               | Yes  | P                | path/likely path* <sub>2</sub> | <a href="https://www.ncbi.nlm.nih.gov/clinvar/variation/51801/">https://www.ncbi.nlm.nih.gov/clinvar/variation/51801/</a>   | 1       | 0 of 1 (0%)          | 0 of 1 (0%)            |
| 3  | BRCA2 | Frameshift     | c.658_659delGT     | p.Val220Ilefs*4  | Yes  | P                | pathogenic* <sub>3</sub>       | <a href="https://www.ncbi.nlm.nih.gov/clinvar/variation/9342/">https://www.ncbi.nlm.nih.gov/clinvar/variation/9342/</a>     | 2       | 0 of 2 (0%)          | 0 of 1 (0%)            |
| 4  | BRCA2 | Frameshift     | c.1189_1190insTTAG | p.Gln397Leufs*25 | Yes  | P                | pathogenic* <sub>3</sub>       | <a href="https://www.ncbi.nlm.nih.gov/clinvar/variation/51080/">https://www.ncbi.nlm.nih.gov/clinvar/variation/51080/</a>   | 2       | 0 of 2 (0%)          | -                      |
| 5  | BRCA2 | Frameshift     | c.1192delC         | p.Leu398*        | Yes  | P                | pathogenic* <sub>2</sub>       | <a href="https://www.ncbi.nlm.nih.gov/clinvar/variation/409454/">https://www.ncbi.nlm.nih.gov/clinvar/variation/409454/</a> | 1       | 0 of 1 (0%)          | -                      |
| 6  | BRCA2 | Frameshift     | c.1321_1324delACTT | p.Thr441Glnfs*18 | Yes  | P                | pathogenic* <sub>1</sub>       | <a href="https://www.ncbi.nlm.nih.gov/clinvar/variation/418992/">https://www.ncbi.nlm.nih.gov/clinvar/variation/418992/</a> | 1       | 1 of 1 (100%)        | 1 of 1 (100%)          |
| 7* | BRCA2 | Termination    | c.1381G>T          | p.Glu461*        | Yes  | P                | (novel)                        | <a href="https://www.ncbi.nlm.nih.gov/clinvar/variation/440457/">https://www.ncbi.nlm.nih.gov/clinvar/variation/440457/</a> | 1       | 0 of 1 (0%)          | 0 of 1 (0%)            |
| 8  | BRCA2 | Frameshift     | c.1763_1766delATAA | p.Asn588Serfs*25 | Yes  | P                | pathogenic* <sub>3</sub>       | <a href="https://www.ncbi.nlm.nih.gov/clinvar/variation/51187/">https://www.ncbi.nlm.nih.gov/clinvar/variation/51187/</a>   | 1       | 1 of 1 (100%)        | 1 of 1 (100%)          |
| 9  | BRCA2 | Termination    | c.1800T>G          | p.Tyr600*        | Yes  | P                | pathogenic* <sub>3</sub>       | <a href="https://www.ncbi.nlm.nih.gov/clinvar/variation/51199/">https://www.ncbi.nlm.nih.gov/clinvar/variation/51199/</a>   | 1       | 0 of 1 (0%)          | 0 of 1 (0%)            |
| 10 | BRCA2 | Frameshift     | c.1813dupA         | p.Ile605Asnfs*11 | Yes  | P                | pathogenic* <sub>3</sub>       | <a href="https://www.ncbi.nlm.nih.gov/clinvar/variation/37762/">https://www.ncbi.nlm.nih.gov/clinvar/variation/37762/</a>   | 3       | 1 of 3 (33%)         | 1 of 3 (33%)           |
| 11 | BRCA2 | Termination    | c.1832C>G          | p.Ser611*        | Yes  | P                | pathogenic* <sub>3</sub>       | <a href="https://www.ncbi.nlm.nih.gov/clinvar/variation/228323/">https://www.ncbi.nlm.nih.gov/clinvar/variation/228323/</a> | 1       | 0 of 1 (0%)          | -                      |
| 12 | BRCA2 | Frameshift     | c.1929delG         | p.Arg645Glnfs*15 | Yes  | P                | pathogenic* <sub>3</sub>       | <a href="https://www.ncbi.nlm.nih.gov/clinvar/variation/37769/">https://www.ncbi.nlm.nih.gov/clinvar/variation/37769/</a>   | 2       | 1 of 2 (50%)         | 1 of 1 (100%)          |
| 13 | BRCA2 | Frameshift     | c.2092delC         | p.Leu698Tyrfs*32 | Yes  | P                | pathogenic* <sub>3</sub>       | <a href="https://www.ncbi.nlm.nih.gov/clinvar/variation/37774/">https://www.ncbi.nlm.nih.gov/clinvar/variation/37774/</a>   | 1       | 0 of 1 (0%)          | 0 of 1 (0%)            |
| 14 | BRCA2 | Termination    | c.2339C>G          | p.Ser780*        | Yes  | P                | pathogenic* <sub>3</sub>       | <a href="https://www.ncbi.nlm.nih.gov/clinvar/variation/141070/">https://www.ncbi.nlm.nih.gov/clinvar/variation/141070/</a> | 1       | 0 of 1 (0%)          | -                      |
| 15 | BRCA2 | Termination    | c.2368G>T          | p.Glu790*        | Yes  | P                | pathogenic* <sub>3</sub>       | <a href="https://www.ncbi.nlm.nih.gov/clinvar/variation/91776/">https://www.ncbi.nlm.nih.gov/clinvar/variation/91776/</a>   | 1       | 0 of 1 (0%)          | 0 of 1 (0%)            |
| 16 | BRCA2 | Termination    | c.2409T>G          | p.Tyr803*        | Yes  | P                | pathogenic* <sub>3</sub>       | <a href="https://www.ncbi.nlm.nih.gov/clinvar/variation/37784/">https://www.ncbi.nlm.nih.gov/clinvar/variation/37784/</a>   | 1       | 0 of 1 (0%)          | 0 of 1 (0%)            |
| 17 | BRCA2 | Frameshift     | c.2808_2811delACAA | p.Ala938Profs*21 | Yes  | P                | pathogenic* <sub>3</sub>       | <a href="https://www.ncbi.nlm.nih.gov/clinvar/variation/9322/">https://www.ncbi.nlm.nih.gov/clinvar/variation/9322/</a>     | 2       | 1 of 2 (50%)         | 1 of 1 (100%)          |
| 18 | BRCA2 | Frameshift     | c.3167_3170delAAAA | p.Gln1056Argfs*3 | Yes  | P                | pathogenic* <sub>3</sub>       | <a href="https://www.ncbi.nlm.nih.gov/clinvar/variation/51413/">https://www.ncbi.nlm.nih.gov/clinvar/variation/51413/</a>   | 1       | 0 of 1 (0%)          | 0 of 1 (0%)            |
| 19 | BRCA2 | Termination    | c.3172A>T          | p.Lys1058*       | Yes  | P                | pathogenic* <sub>3</sub>       | <a href="https://www.ncbi.nlm.nih.gov/clinvar/variation/182196/">https://www.ncbi.nlm.nih.gov/clinvar/variation/182196/</a> | 2       | 0 of 2 (0%)          | 0 of 1 (0%)            |
| 20 | BRCA2 | Termination    | c.3187C>T          | p.Gln1063*       | Yes  | P                | pathogenic* <sub>3</sub>       | <a href="https://www.ncbi.nlm.nih.gov/clinvar/variation/228324/">https://www.ncbi.nlm.nih.gov/clinvar/variation/228324/</a> | 10      | 0 of 10 (0%)         | 0 of 6 (0%)            |

|      | Gene  | Function    | cDNA position       | Protein change    | pLOF | LMM variant call | ClinVar Significance     | ClinVar link (accessed 1/1/18)                                                                                              | # cases | Cancer Reported All | Cancer Reported Women |
|------|-------|-------------|---------------------|-------------------|------|------------------|--------------------------|-----------------------------------------------------------------------------------------------------------------------------|---------|---------------------|-----------------------|
| 21   | BRCA2 | Frameshift  | c.3545_3546delTT    | p.Phe1182*        | Yes  | P                | pathogenic* <sub>3</sub> | <a href="https://www.ncbi.nlm.nih.gov/clinvar/variation/37846/">https://www.ncbi.nlm.nih.gov/clinvar/variation/37846/</a>   | 6       | 0 of 6 (0%)         | 0 of 2 (0%)           |
| 22   | BRCA2 | Frameshift  | c.3680_3681delTG    | p.Leu1227Glnfs*5  | Yes  | P                | pathogenic* <sub>3</sub> | <a href="https://www.ncbi.nlm.nih.gov/clinvar/variation/51504/">https://www.ncbi.nlm.nih.gov/clinvar/variation/51504/</a>   | 1       | 0 of 1 (0%)         | -                     |
| 23   | BRCA2 | Frameshift  | c.3847_3848delGT    | p.Val1283Lysfs*2  | Yes  | P                | pathogenic* <sub>3</sub> | <a href="https://www.ncbi.nlm.nih.gov/clinvar/variation/37859/">https://www.ncbi.nlm.nih.gov/clinvar/variation/37859/</a>   | 5       | 2 of 5 (40%)        | 1 of 3 (33%)          |
| 24 * | BRCA2 | Frameshift  | c.4103delT          | p.Leu1368Tyrfs*6  | Yes  | P                | (novel)                  | <a href="https://www.ncbi.nlm.nih.gov/clinvar/variation/440456/">https://www.ncbi.nlm.nih.gov/clinvar/variation/440456/</a> | 1       | 0 of 1 (0%)         | 0 of 1 (0%)           |
| 25   | BRCA2 | Frameshift  | c.4284dupT          | p.Gln1429Serfs*9  | Yes  | P                | pathogenic* <sub>3</sub> | <a href="https://www.ncbi.nlm.nih.gov/clinvar/variation/37892/">https://www.ncbi.nlm.nih.gov/clinvar/variation/37892/</a>   | 2       | 0 of 2 (0%)         | 0 of 2 (0%)           |
| 26   | BRCA2 | Frameshift  | c.4419delC          | p.Asn1473Lysfs*6  | Yes  | P                | Pathogenic* <sub>1</sub> | <a href="https://www.ncbi.nlm.nih.gov/clinvar/variation/420191/">https://www.ncbi.nlm.nih.gov/clinvar/variation/420191/</a> | 1       | 0 of 1 (0%)         | 0 of 1 (0%)           |
| 27   | BRCA2 | Termination | c.4588A>T           | p.Lys1530*        | Yes  | P                | pathogenic* <sub>3</sub> | <a href="https://www.ncbi.nlm.nih.gov/clinvar/variation/51678/">https://www.ncbi.nlm.nih.gov/clinvar/variation/51678/</a>   | 1       | 0 of 1 (0%)         | 0 of 1 (0%)           |
| 28   | BRCA2 | Frameshift  | c.4876_4877delAA    | p.Asn1626Serfs*12 | Yes  | P                | pathogenic* <sub>3</sub> | <a href="https://www.ncbi.nlm.nih.gov/clinvar/variation/37929/">https://www.ncbi.nlm.nih.gov/clinvar/variation/37929/</a>   | 2       | 0 of 2 (0%)         | 0 of 1 (0%)           |
| 29   | BRCA2 | Termination | c.4889C>G           | p.Ser1630*        | Yes  | P                | Pathogenic* <sub>3</sub> | <a href="https://www.ncbi.nlm.nih.gov/clinvar/variation/51732/">https://www.ncbi.nlm.nih.gov/clinvar/variation/51732/</a>   | 1       | 0 of 1 (0%)         | 0 of 1 (0%)           |
| 30   | BRCA2 | Frameshift  | c.4936_4939delGAAA  | p.Glu1646Glnfs*23 | Yes  | P                | pathogenic* <sub>3</sub> | <a href="https://www.ncbi.nlm.nih.gov/clinvar/variation/37935/">https://www.ncbi.nlm.nih.gov/clinvar/variation/37935/</a>   | 1       | 0 of 1 (0%)         | 0 of 1 (0%)           |
| 31   | BRCA2 | Termination | c.4965C>G           | p.Tyr1655*        | Yes  | P                | pathogenic* <sub>3</sub> | <a href="https://www.ncbi.nlm.nih.gov/clinvar/variation/37936/">https://www.ncbi.nlm.nih.gov/clinvar/variation/37936/</a>   | 14      | 1 of 14 (7%)        | 1 of 8 (12%)          |
| 32   | BRCA2 | Frameshift  | c.4947_4948delAA    | p.Pro1651Cysfs*14 | Yes  | P                | Pathogenic* <sub>3</sub> | <a href="https://www.ncbi.nlm.nih.gov/clinvar/variation/51747/">https://www.ncbi.nlm.nih.gov/clinvar/variation/51747/</a>   | 1       | 0 of 1 (0%)         | 0 of 1 (0%)           |
| 33   | BRCA2 | Frameshift  | c.5073dupA          | p.Trp1692Metfs*3  | Yes  | P                | pathogenic* <sub>3</sub> | <a href="https://www.ncbi.nlm.nih.gov/clinvar/variation/37943/">https://www.ncbi.nlm.nih.gov/clinvar/variation/37943/</a>   | 2       | 0 of 2 (0%)         | -                     |
| 34   | BRCA2 | Frameshift  | c.5157_5161delTTCAA | p.Asn1719Lysfs*6  | Yes  | P                | pathogenic* <sub>3</sub> | <a href="https://www.ncbi.nlm.nih.gov/clinvar/variation/51780/">https://www.ncbi.nlm.nih.gov/clinvar/variation/51780/</a>   | 3       | 1 of 3 (33%)        | -                     |
| 35   | BRCA2 | Frameshift  | c.5217_5220delTTTA  | p.Tyr1739*        | Yes  | P                | pathogenic* <sub>3</sub> | <a href="https://www.ncbi.nlm.nih.gov/clinvar/variation/51820/">https://www.ncbi.nlm.nih.gov/clinvar/variation/51820/</a>   | 1       | 0 of 1 (0%)         | -                     |
| 36   | BRCA2 | Frameshift  | c.5350_5351delAA    | p.Asn1784Hisfs*2  | Yes  | P                | pathogenic* <sub>3</sub> | <a href="https://www.ncbi.nlm.nih.gov/clinvar/variation/37959/">https://www.ncbi.nlm.nih.gov/clinvar/variation/37959/</a>   | 2       | 1 of 2 (50%)        | 1 of 1 (100%)         |
| 37 * | BRCA2 | Frameshift  | c.5352dupC          | p.Thr1785Hisfs*2  | Yes  | P                | (novel)                  | <a href="https://www.ncbi.nlm.nih.gov/clinvar/variation/548420/">https://www.ncbi.nlm.nih.gov/clinvar/variation/548420/</a> | 2       | 1 of 2 (50%)        | 1 of 1 (100%)         |
| 38   | BRCA2 | Frameshift  | c.5410_5411delGT    | p.Val1804Lysfs*2  | Yes  | P                | pathogenic* <sub>3</sub> | <a href="https://www.ncbi.nlm.nih.gov/clinvar/variation/37963/">https://www.ncbi.nlm.nih.gov/clinvar/variation/37963/</a>   | 1       | 0 of 1 (0%)         | -                     |
| 39   | BRCA2 | Frameshift  | c.5576_5579delTTAA  | p.Ile1859Lysfs*3  | Yes  | P                | pathogenic* <sub>3</sub> | <a href="https://www.ncbi.nlm.nih.gov/clinvar/variation/37975/">https://www.ncbi.nlm.nih.gov/clinvar/variation/37975/</a>   | 1       | 0 of 1 (0%)         | -                     |
| 40   | BRCA2 | Termination | c.5614A>T           | p.Lys1872*        | Yes  | P                | pathogenic* <sub>3</sub> | <a href="https://www.ncbi.nlm.nih.gov/clinvar/variation/37979/">https://www.ncbi.nlm.nih.gov/clinvar/variation/37979/</a>   | 1       | 0 of 1 (0%)         | 0 of 1 (0%)           |
| 41   | BRCA2 | Frameshift  | c.5681dupA          | p.Tyr1894*        | Yes  | P                | pathogenic* <sub>3</sub> | <a href="https://www.ncbi.nlm.nih.gov/clinvar/variation/37988/">https://www.ncbi.nlm.nih.gov/clinvar/variation/37988/</a>   | 1       | 0 of 1 (0%)         | 0 of 1 (0%)           |
|      |       |             |                     |                   |      |                  |                          |                                                                                                                             |         |                     |                       |

|    | Gene  | Function       | cDNA position       | Protein change    | pLOF | LMM variant call | ClinVar Significance     | ClinVar link (accessed 1/1/18)                                                                                              | # cases | Cancer Reported All | Cancer Reported Women |
|----|-------|----------------|---------------------|-------------------|------|------------------|--------------------------|-----------------------------------------------------------------------------------------------------------------------------|---------|---------------------|-----------------------|
| 42 | BRCA2 | Frameshift     | c.5722_5723delCT    | p.Leu1908Argfs*2  | Yes  | P                | pathogenic*3             | <a href="https://www.ncbi.nlm.nih.gov/clinvar/variation/9320/">https://www.ncbi.nlm.nih.gov/clinvar/variation/9320/</a>     | 24      | 7 of 24 (29%)       | 5 of 15 (33%)         |
| 43 | BRCA2 | Termination    | c.5857G>T           | p.Glu1953*        | Yes  | P                | pathogenic*3             | <a href="https://www.ncbi.nlm.nih.gov/clinvar/variation/51952/">https://www.ncbi.nlm.nih.gov/clinvar/variation/51952/</a>   | 1       | 0 of 1 (0%)         | 0 of 1 (0%)           |
| 44 | BRCA2 | Frameshift     | c.5946delT          | p.Ser1982Argfs*22 | Yes  | P                | pathogenic*3             | <a href="https://www.ncbi.nlm.nih.gov/clinvar/variation/9325/">https://www.ncbi.nlm.nih.gov/clinvar/variation/9325/</a>     | 3       | 0 of 3 (0%)         | 0 of 1 (0%)           |
| 45 | BRCA2 | Termination    | c.6037A>T           | p.Lys2013*        | Yes  | P                | pathogenic*3             | <a href="https://www.ncbi.nlm.nih.gov/clinvar/variation/38016/">https://www.ncbi.nlm.nih.gov/clinvar/variation/38016/</a>   | 5       | 0 of 5 (0%)         | 0 of 1 (0%)           |
| 46 | BRCA2 | Frameshift     | c.6405_6409delCTTAA | p.Asn2135Lysfs*3  | Yes  | P                | pathogenic*3             | <a href="https://www.ncbi.nlm.nih.gov/clinvar/variation/38043/">https://www.ncbi.nlm.nih.gov/clinvar/variation/38043/</a>   | 1       | 0 of 1 (0%)         | 0 of 1 (0%)           |
| 47 | BRCA2 | Frameshift     | c.6468_6469delITC   | p.Gln2157Ilefs*18 | Yes  | P                | pathogenic*3             | <a href="https://www.ncbi.nlm.nih.gov/clinvar/variation/38047/">https://www.ncbi.nlm.nih.gov/clinvar/variation/38047/</a>   | 1       | 0 of 1 (0%)         | -                     |
| 48 | BRCA2 | Frameshift     | c.6644_6647delACTC  | p.Tyr2215Serfs*13 | Yes  | P                | pathogenic*3             | <a href="https://www.ncbi.nlm.nih.gov/clinvar/variation/38060/">https://www.ncbi.nlm.nih.gov/clinvar/variation/38060/</a>   | 3       | 0 of 3 (0%)         | 0 of 3 (0%)           |
| 49 | BRCA2 | Frameshift     | c.6998dupT          | p.Pro2334Thrfs*6  | Yes  | P                | pathogenic*3             | <a href="https://www.ncbi.nlm.nih.gov/clinvar/variation/219496/">https://www.ncbi.nlm.nih.gov/clinvar/variation/219496/</a> | 1       | 0 of 1 (0%)         | -                     |
| 50 | BRCA2 | Frameshift     | c.7069_7070delCT    | p.Leu2357Valfs*2  | Yes  | P                | pathogenic*3             | <a href="https://www.ncbi.nlm.nih.gov/clinvar/variation/38082/">https://www.ncbi.nlm.nih.gov/clinvar/variation/38082/</a>   | 18      | 2 of 18 (11%)       | 1 of 12 (8%)          |
| 51 | BRCA2 | Splice variant | c.7436-2A>T         | NA                | Yes  | P                | pathogenic*1             | <a href="http://www.ncbi.nlm.nih.gov/clinvar/variation/52330">http://www.ncbi.nlm.nih.gov/clinvar/variation/52330</a>       | 1       | 0 of 1 (0%)         | -                     |
| 52 | BRCA2 | Termination    | c.7558C>T           | p.Arg2520*        | Yes  | P                | pathogenic*3             | <a href="https://www.ncbi.nlm.nih.gov/clinvar/variation/52353/">https://www.ncbi.nlm.nih.gov/clinvar/variation/52353/</a>   | 2       | 1 of 2 (50%)        | 1 of 2 (50%)          |
| 53 | BRCA2 | Frameshift     | c.7762delA          | p.Ile2588Tyrfs*60 | Yes  | P                | pathogenic*3             | <a href="https://www.ncbi.nlm.nih.gov/clinvar/variation/52405/">https://www.ncbi.nlm.nih.gov/clinvar/variation/52405/</a>   | 2       | 1 of 2 (50%)        | 0 of 1 (0%)           |
| 54 | BRCA2 | Missense       | c.7878G>C           | p.Trp2626Cys      | No   | P                | pathogenic*3             | <a href="https://www.ncbi.nlm.nih.gov/clinvar/variation/38125/">https://www.ncbi.nlm.nih.gov/clinvar/variation/38125/</a>   | 2       | 0 of 2 (0%)         | 0 of 1 (0%)           |
| 55 | BRCA2 | Missense       | c.8243G>A           | p.Gly2748Asp      | No   | P                | pathogenic*3             | <a href="https://www.ncbi.nlm.nih.gov/clinvar/variation/52535/">https://www.ncbi.nlm.nih.gov/clinvar/variation/52535/</a>   | 1       | 0 of 1 (0%)         | 0 of 1 (0%)           |
| 56 | BRCA2 | Splice variant | c.8487+1G>A         | NA                | Yes  | P                | pathogenic*3             | <a href="https://www.ncbi.nlm.nih.gov/clinvar/variation/52602/">https://www.ncbi.nlm.nih.gov/clinvar/variation/52602/</a>   | 3       | 1 of 3 (33%)        | 0 of 1 (0%)           |
| 57 | BRCA2 | Termination    | c.8489G>A           | p.Trp2830*        | Yes  | P                | pathogenic*3             | <a href="https://www.ncbi.nlm.nih.gov/clinvar/variation/52605/">https://www.ncbi.nlm.nih.gov/clinvar/variation/52605/</a>   | 2       | 0 of 2 (0%)         | -                     |
| 58 | BRCA2 | Frameshift     | c.8537_8538delAG    | p.Glu2846Glyfs*22 | Yes  | P                | pathogenic*3             | <a href="https://www.ncbi.nlm.nih.gov/clinvar/variation/9328/">https://www.ncbi.nlm.nih.gov/clinvar/variation/9328/</a>     | 1       | 0 of 1 (0%)         | -                     |
| 59 | BRCA2 | Splice variant | c.8755-1G>A         | NA                | Yes  | P                | Uncertain significance*3 | <a href="https://www.ncbi.nlm.nih.gov/clinvar/variation/38183/">https://www.ncbi.nlm.nih.gov/clinvar/variation/38183/</a>   | 1       | 0 of 1 (0%)         | -                     |
| 60 | BRCA2 | Frameshift     | c.8904delC          | p.Thr2968Cysfs*7  | Yes  | P                | pathogenic*3             | <a href="https://www.ncbi.nlm.nih.gov/clinvar/variation/38192/">https://www.ncbi.nlm.nih.gov/clinvar/variation/38192/</a>   | 4       | 2 of 4 (50%)        | 2 of 3 (66%)          |
| 61 | BRCA2 | Splice variant | c.8953+1G>T         | NA                | Yes  | P                | pathogenic*3             | <a href="https://www.ncbi.nlm.nih.gov/clinvar/variation/38198/">https://www.ncbi.nlm.nih.gov/clinvar/variation/38198/</a>   | 3       | 0 of 3 (0%)         | 0 of 1 (0%)           |
| 62 | BRCA2 | Missense       | c.9004G>A           | p.Glu3002Lys      | No   | P                | conflicting*1            | <a href="https://www.ncbi.nlm.nih.gov/clinvar/variation/38201/">https://www.ncbi.nlm.nih.gov/clinvar/variation/38201/</a>   | 1       | 0 of 1 (0%)         | -                     |

|      | Gene  | Function   | cDNA position | Protein change    | pLOF | LMM variant call | ClinVar Significance | ClinVar link (accessed 1/1/18)                                                                                              | # cases | Cancer Reported All | Cancer Reported Women |
|------|-------|------------|---------------|-------------------|------|------------------|----------------------|-----------------------------------------------------------------------------------------------------------------------------|---------|---------------------|-----------------------|
| 63   | BRCA2 | Frameshift | c.9097dupA    | p.Thr3033Asnfs*11 | Yes  | P                | pathogenic *3        | <a href="https://www.ncbi.nlm.nih.gov/clinvar/variation/38208/">https://www.ncbi.nlm.nih.gov/clinvar/variation/38208/</a>   | 1       | 0 of 1 (0%)         | 0 of 1 (0%)           |
| 64   | BRCA2 | Frameshift | c.9253delA    | P.Thr3085Glnfs*19 | Yes  | P                | pathogenic *3        | <a href="https://www.ncbi.nlm.nih.gov/clinvar/variation/52785/">https://www.ncbi.nlm.nih.gov/clinvar/variation/52785/</a>   | 3       | 1 of 3 (33%)        | 1 of 2 (50%)          |
| 65   | BRCA2 | Frameshift | c.9672dupA    | p.Tyr3225Ilefs*30 | Yes  | P                | pathogenic *3        | <a href="https://www.ncbi.nlm.nih.gov/clinvar/variation/126217/">https://www.ncbi.nlm.nih.gov/clinvar/variation/126217/</a> | 1       | 0 of 1 (0%)         | -                     |
| 66 * | BRCA2 | Frameshift | c.9777delT    | p.Ile3259Metfs*16 | Yes  | LP               | (novel)              | NA                                                                                                                          | 1       | 0 of 1 (0%)         | 0 of 1 (0%)           |

\* Row 7- this variant was first reported by this project in ClinVar (01-2017)

\* Row 24 - this variant was first reported by this project in ClinVar (12-2016)

\* Row 37 – this variant was first reported by this project in ClinVar (08-2017)

\* Row 66 - report of this variant in ClinVar by this project is pending



**eTable 2.** The Overall Prevalence and Prevalence Controlling for Relatedness

The overall prevalence in the entire cohort (N=50,726) and the prevalence in a subcohort (N=38,339) where only one individual in every first and second degree relationship was included. The algorithm for determining relatedness has been described (Ref 19, 25)

| <b>COHORT<br/>N</b> | <b>CASES<br/>N (%)</b> | <b>PREVALENCE</b> |
|---------------------|------------------------|-------------------|
| 50726               | 267 (0.53)             | 1/190             |
| 38339               | 213 (0.56)             | 1/180             |

**eTable 3.** Cause of Death Analysis

Among the 23 cases of individuals with P/LP *BRCA1/2* variants there were 11 (47.8%) cases with relevant cancers, and at least 9 (39.1%) died of HBOC associated disease.

|                         |      | Cause of Death        |                            |               | Family History (EHR based) |                           | HBOC Associated cancers |         |          |            |      |
|-------------------------|------|-----------------------|----------------------------|---------------|----------------------------|---------------------------|-------------------------|---------|----------|------------|------|
|                         | N=23 | BRCA associated (N=9) | Non-BRCA Associated (N=11) | Unknown (N=3) | Family History (+) (N=10)  | Family History (-) (N=13) | Breast                  | Ovarian | Prostate | Pancreatic | None |
| <b>Female</b>           | 12   | 7                     | 3                          | 2             | 8                          | 4                         | 4                       | 5       | -        | 0          | 3    |
| <b>Male</b>             | 11   | 2                     | 8                          | 1             | 2                          | 9                         | 0                       | -       | 1        | 1          | 9    |
| <b><i>BRCA1</i></b>     | 9    | 4                     | 4                          | 1             | 5                          | 4                         | 1                       | 3       | 0        | 0          | 5    |
| <b><i>BRCA2</i></b>     | 14   | 5                     | 7                          | 2             | 5                          | 9                         | 3                       | 2       | 1        | 1          | 7    |
| <b>Prior Testing</b>    | 4    | 4                     | 0                          | 0             | 4                          | 0                         | 2                       | 2       | 0        | 0          | 0    |
| <b>No Prior Testing</b> | 19   | 5                     | 11                         | 3             | 6                          | 13                        | 2                       | 3       | 1        | 1          | 12   |

**eTable 4.** Relevant Cancer Among the Living Cases

18.4% (45/244) of living *BRCA1/2* cases were found to have relevant cancer diagnoses. The cancers are broken down by anatomic sites in women v. men, *BRCA1* v. *BRCA2*, and in those with and without prior testing.

|                         |       | Family History<br>(EHR based)    |                                  | HBOC Associated cancers |                 |                   |                   |                 |
|-------------------------|-------|----------------------------------|----------------------------------|-------------------------|-----------------|-------------------|-------------------|-----------------|
|                         | N=244 | Family History<br>(+)<br>(N=129) | Family History<br>(-)<br>(N=115) | Breast<br>(N=27)        | Ovarian<br>N=10 | Prostate<br>(N=9) | Melanoma<br>(N=2) | None<br>(N=199) |
| <b>Female *</b>         | 136   | 91                               | 45                               | 27 *                    | 10 *            | -                 | 0                 | 102             |
| <b>Male</b>             | 108   | 38                               | 70                               | 0                       | -               | 9                 | 2                 | 97              |
| <b><i>BRCA1</i></b>     | 87    | 51                               | 36                               | 14                      | 7               | 4                 | 2                 | 61              |
| <b><i>BRCA2</i></b>     | 157   | 78                               | 79                               | 13                      | 3               | 5                 | 0                 | 138             |
| <b>Prior Testing</b>    | 44    | 38                               | 6                                | 11                      | 4               | 1                 | 0                 | 30              |
| <b>No Prior Testing</b> | 200   | 91                               | 109                              | 16                      | 6               | 8                 | 2                 | 169             |

\* three cases of women with breast and ovarian cancer

**eTable 5.** Table Demonstrating Groupings for Odds Ratio Calculations for Figure 2B-D

|                   | Cases<br>Pos P/LP | Controls<br>Neg P/LP |
|-------------------|-------------------|----------------------|
| Cancer            | a                 | b                    |
| No cancer         | c                 | d                    |
| $\frac{a/c}{b/d}$ |                   |                      |

eFigure 1. Pedigree and Case Story

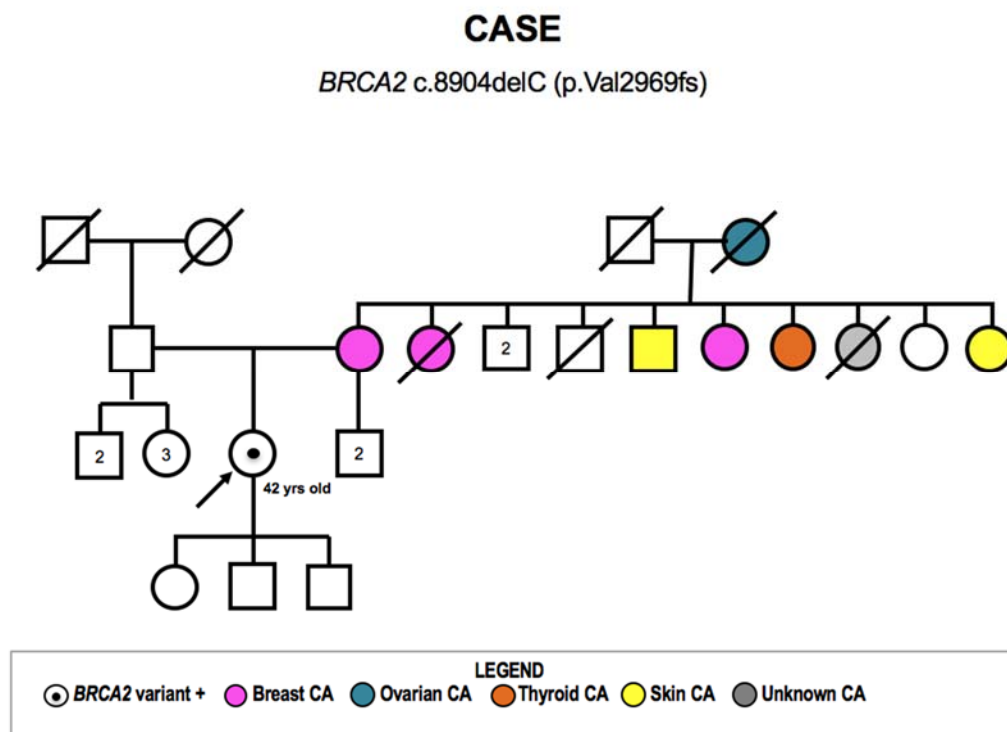

**42-year-old woman with new diagnosis of bilateral ductal carcinoma in situ (DCIS).** A woman with no previous cancer diagnosis received notification of a pathogenic *BRCA2* variant (c.8904delC - ClinVar 38192). Her family history is significant for the following HBOC related cancers: mother diagnosed with breast cancer at age 54 (living), maternal aunt diagnosed with breast cancer at age 39 (deceased), a second maternal aunt diagnosed with breast cancer at age 38 (living), and maternal grandmother diagnosed with ovarian cancer at age 38 (deceased). She had a mammogram that was previously recommended but never carried out. A left breast abnormality on this screening mammogram prompted a biopsy, leading to a diagnosis of DCIS. Subsequent bilateral breast MRI showed no further abnormalities in either breast. She proceeded to bilateral mastectomies, with pathology showing residual DCIS in the left breast and an occult DCIS in the right breast. She was thereby the fourth case of a “group 3” diagnosis (see Table 2) in addition to the three cases described in Buchanan et al.<sup>21</sup>

**eFigure 2.** Family Health History in EHR of *BRCA1/2* Cases (Women and Men)

**Panel A (top).** Data extraction from the pre-return of results EHR of all *BRCA1/2* carriers.

**Panel B (bottom).** Data extraction from the post-return of results EHR of a subset of *BRCA1/2* carriers who reviewed Family Health History with a genetic counselor.

**Note:** In both settings there were twice as many men with no recorded family history of relevant disease in their EHR compared to women.

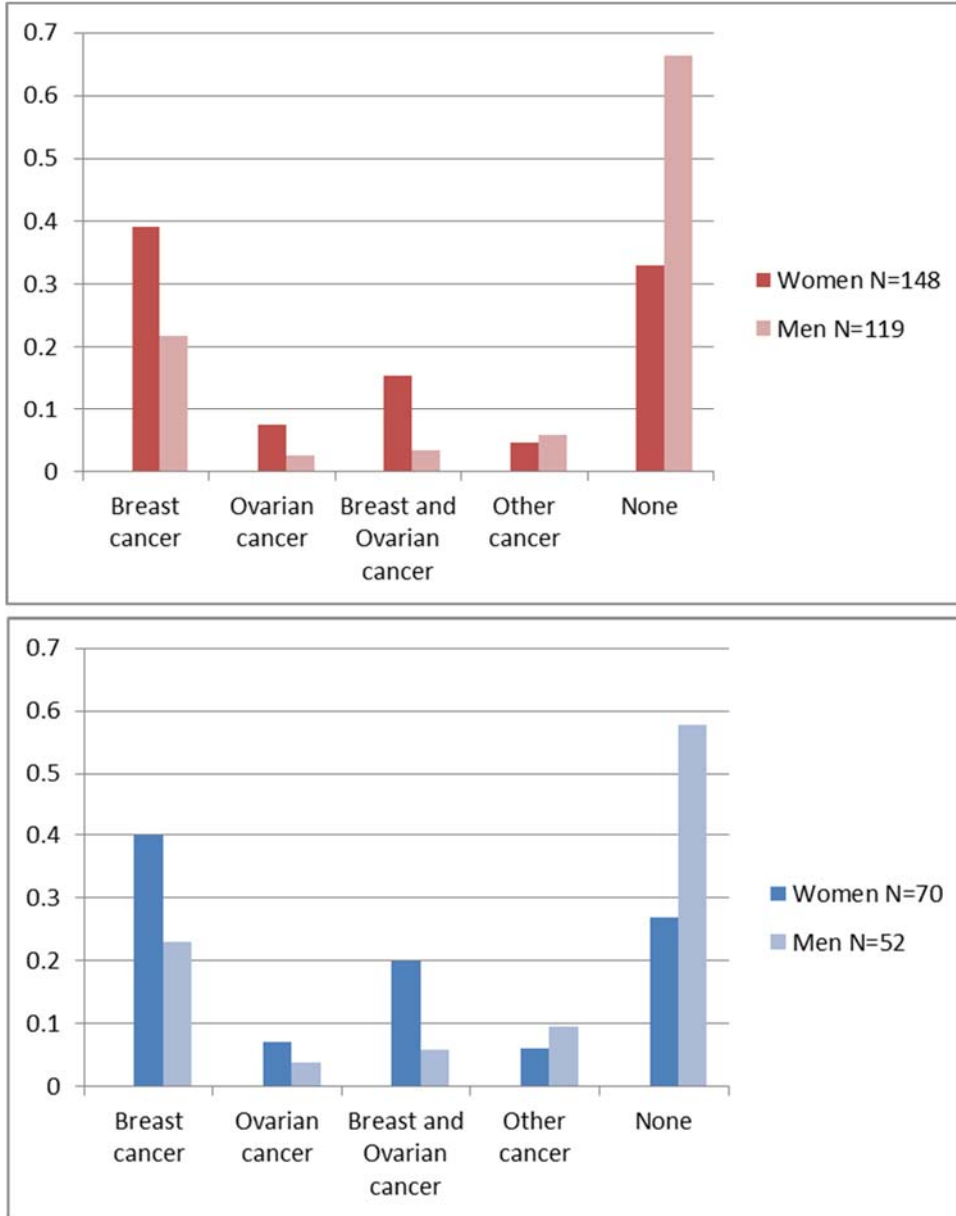

Supplement: jamanetwopen-1-e182140-s001.pdf [file jamanetwopen-1-e182140-s001.pdf]
